# Supplementary material for: The potential role of vitamin D supplementation as a gut microbiota modifier in healthy individuals
Source: PubMed Central journal article supplement (PMC7729960; doi:10.1038/s41598-020-77806-4), 2020-12-10
Supplement: 41598_2020_77806_MOESM1_ESM.pdf [file 41598_2020_77806_MOESM1_ESM.pdf]

# **The potential role of vitamin D supplementation as a gut microbiota modifier in healthy individuals**

Parul Singh<sup>a</sup>, Arun Rawat<sup>a</sup>, Mariam Alwakeel<sup>b</sup>, Elham Sharif<sup>b\*#</sup> and Souhaila Al  
Khodor<sup>a\*#</sup>

*<sup>a</sup>Research Department, Sidra Medicine, Doha, Qatar, <sup>b</sup>College of Health Sciences, Qatar  
University Doha, Qatar*

# Equal senior authors

\*Address correspondence to Dr. Souhaila Al Khodor: and Dr. Elham Sharif: [e.sharif@qu.edu.qa](mailto:e.sharif@qu.edu.qa)

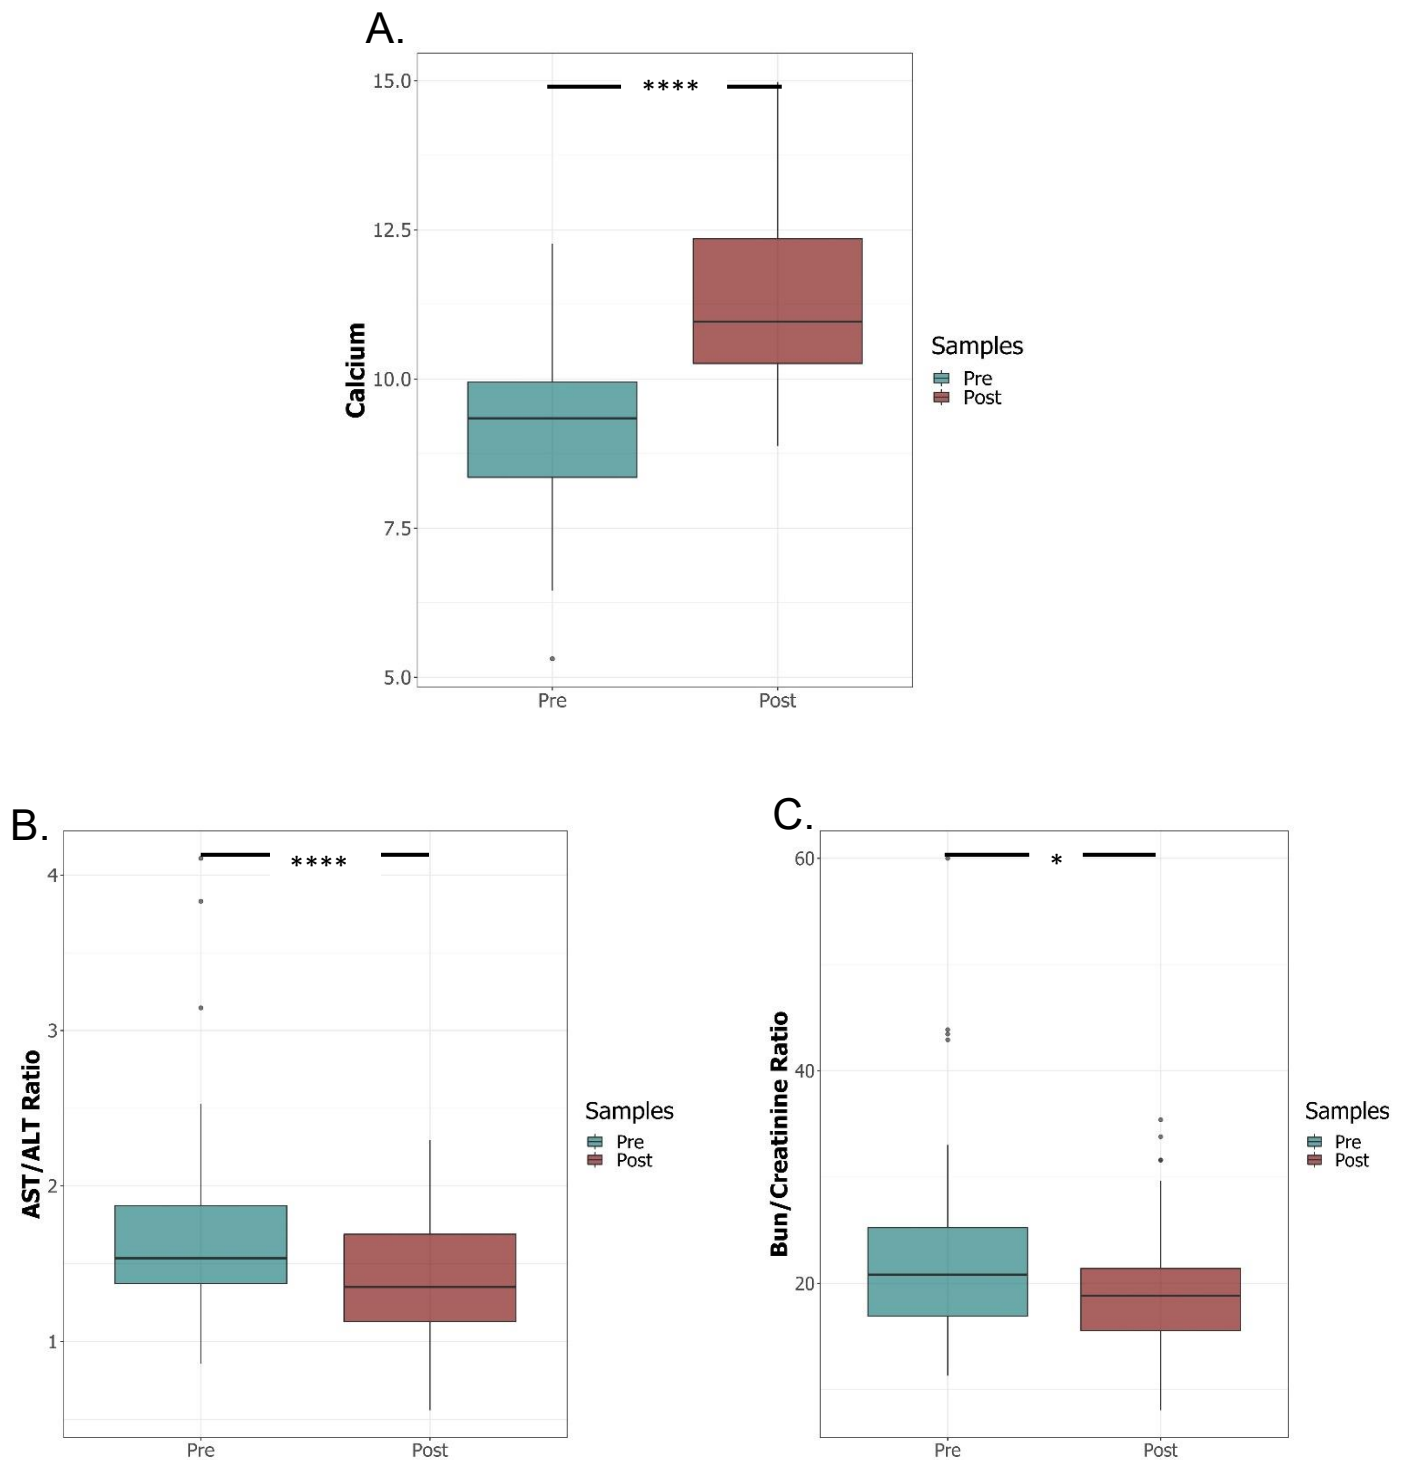

**Supplementary Fig. S1** Blood samples were taken before pre- and post- 12 weeks of supplementation with vitamin D and assayed for levels of (A) Calcium(mg/dl )(Paired Wilcoxon; \*\*\*\*  $p < 0.0001$ ). Levels of (B) BUN(mg/dl) and creatinine(mg/dl), and (C) AST(U/L) and ALT(U/L) were also measured and are presented as ratios (Paired Wilcoxon, \*\*\*\*  $p < 0.0001$  and \* $p = 0.034$ ). The figure was generated using (RStudio v 1.2 with R v 3.6)<sup>1</sup>

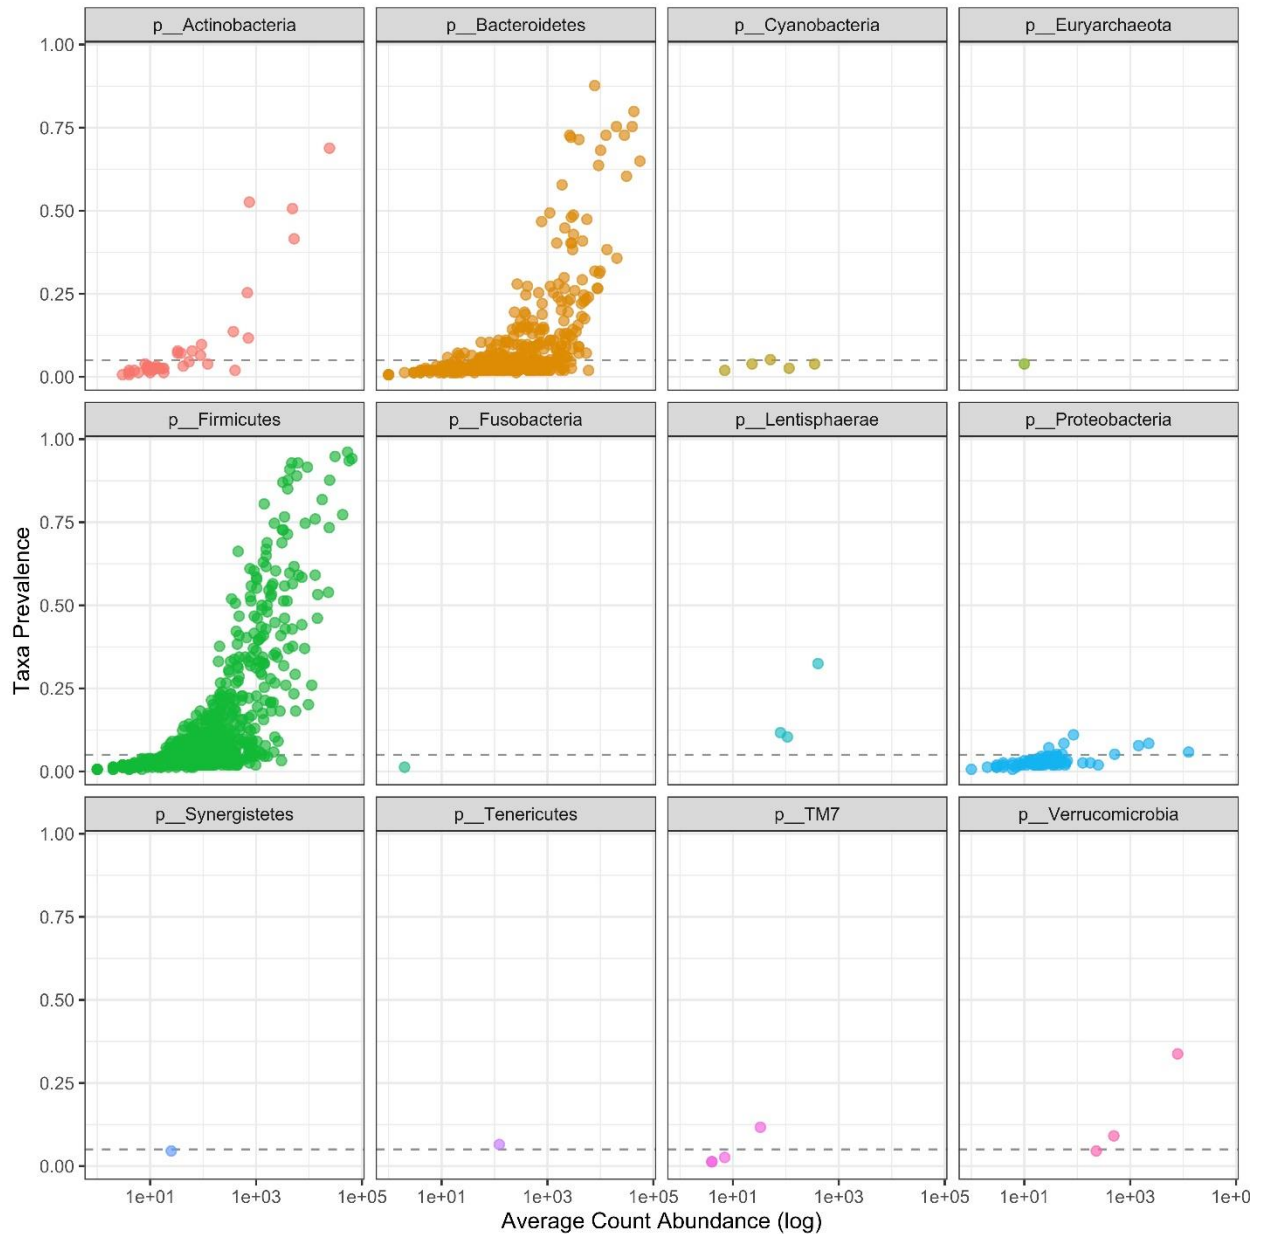

**Supplementary Fig. S2** Prevalence plots (taxa prevalence versus average count) for bacterial taxa representing the phylum-level diversity across pre- and post- vitamin D supplementation stool samples from all women. Each point corresponds to a single taxon. Taxa prevalence is defined as the fraction of samples containing the taxa. The figure was generated using (RStudio v 1.2 with R v 3.6)<sup>1</sup>

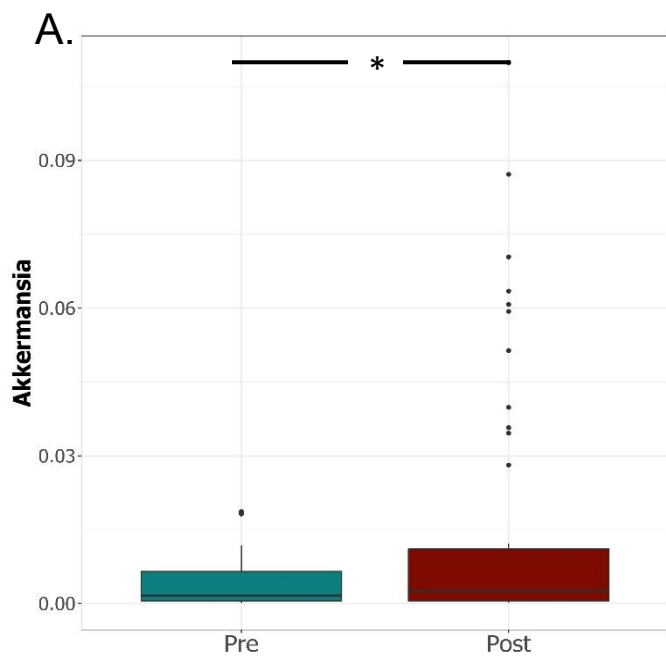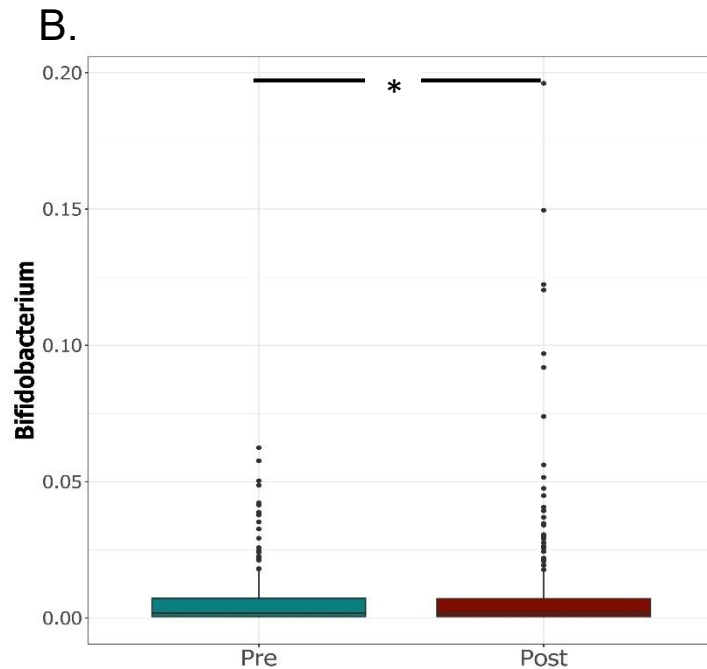

**Supplementary Fig. S3** Box plot representation of the relative abundance of genera (A) *Akkermansia* and (B) *Bifidobacterium* (paired Wilcoxon; \*  $p < 0.05$ ). The figure was generated using (RStudio v 1.2 with R v 3.6)<sup>1</sup>

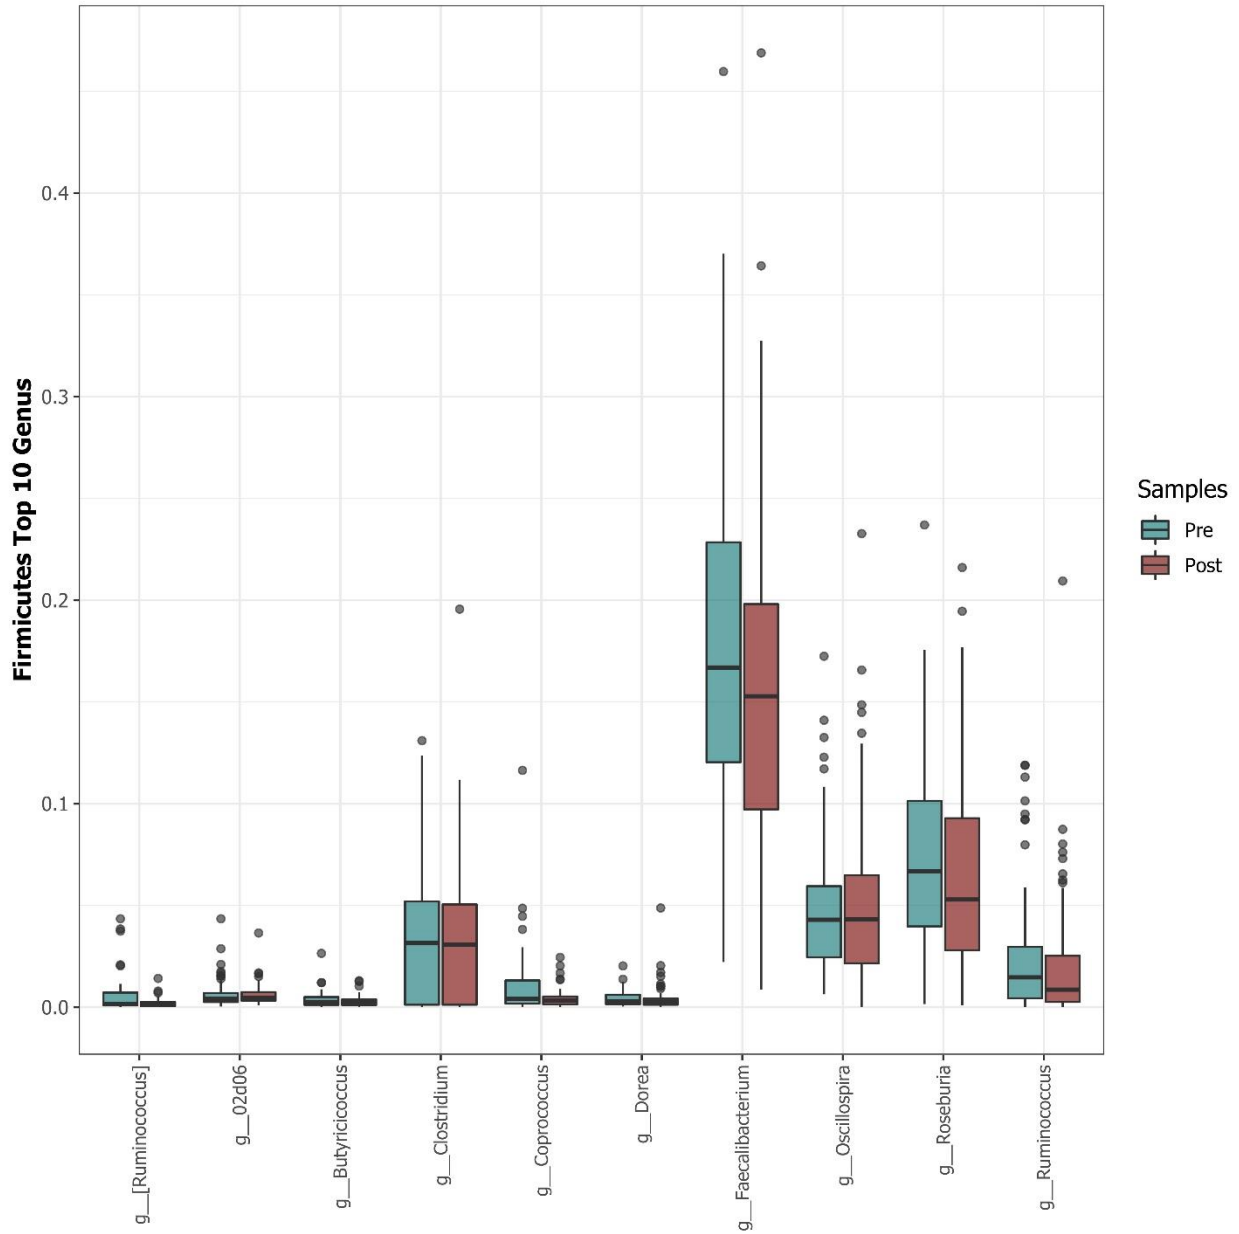

**Supplementary Fig. S4** Box plot representation of the relative abundance of the top 10 genera in the phylum *Firmicutes*. The figure was generated using (RStudio v 1.2 with R v 3.6)<sup>1</sup>

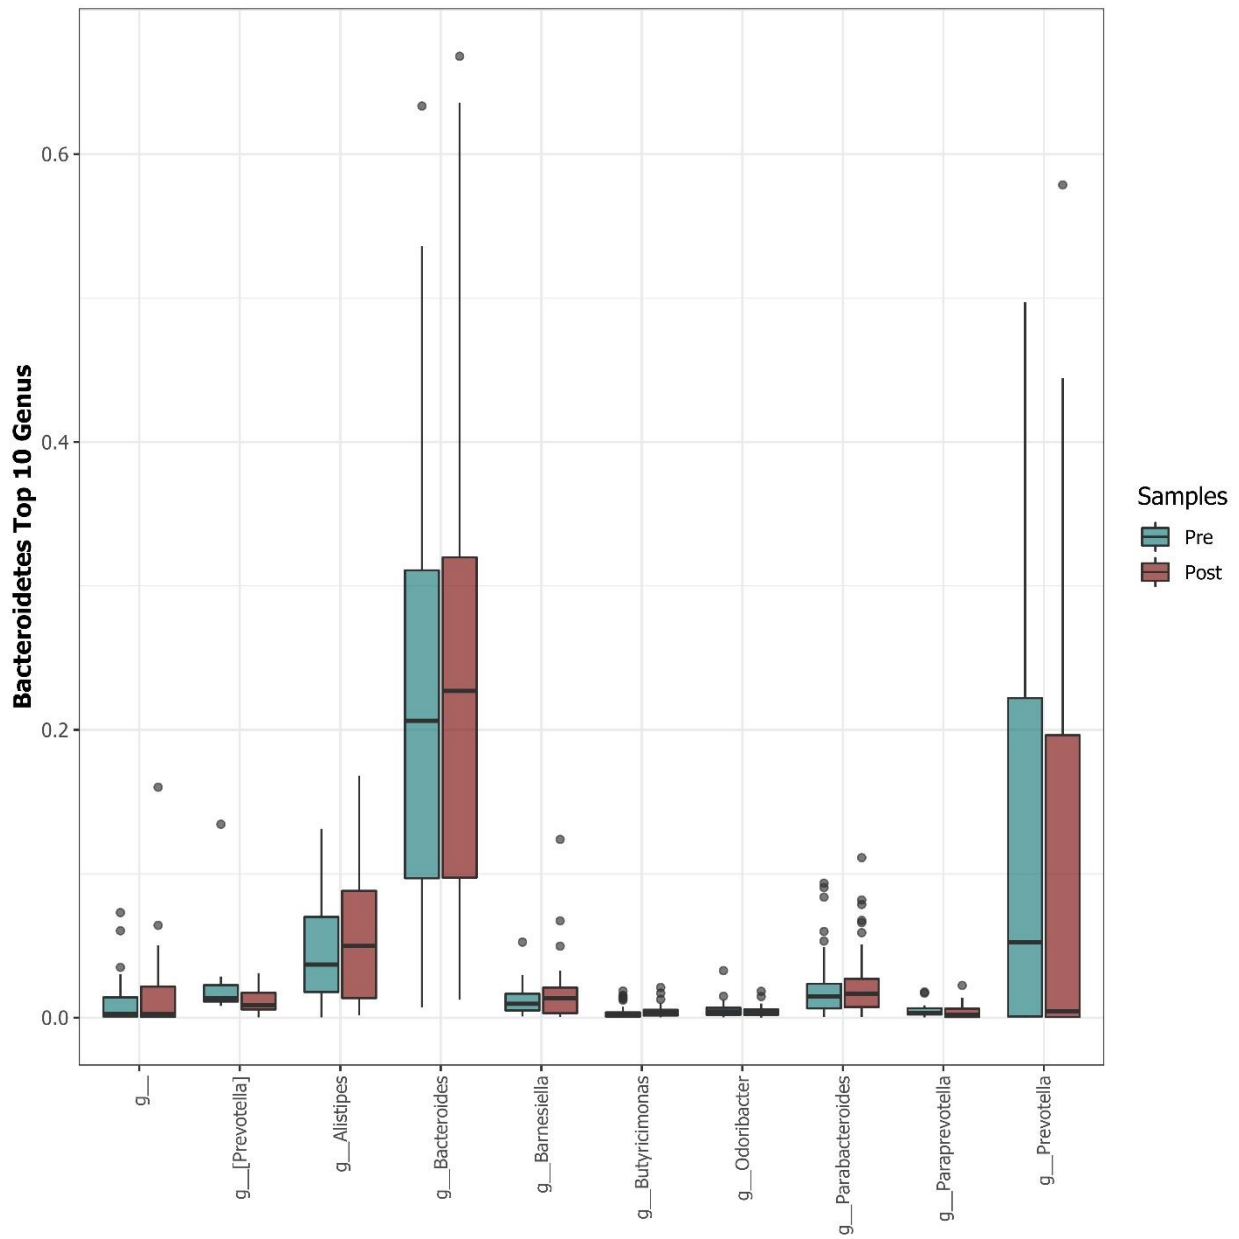

**Supplementary Fig. S5** Box plot representation of the relative abundance of the top 10 genera in phylum Bacteroidetes. The figure was generated using (RStudio v 1.2 with R v 3.6)<sup>1</sup>

A.

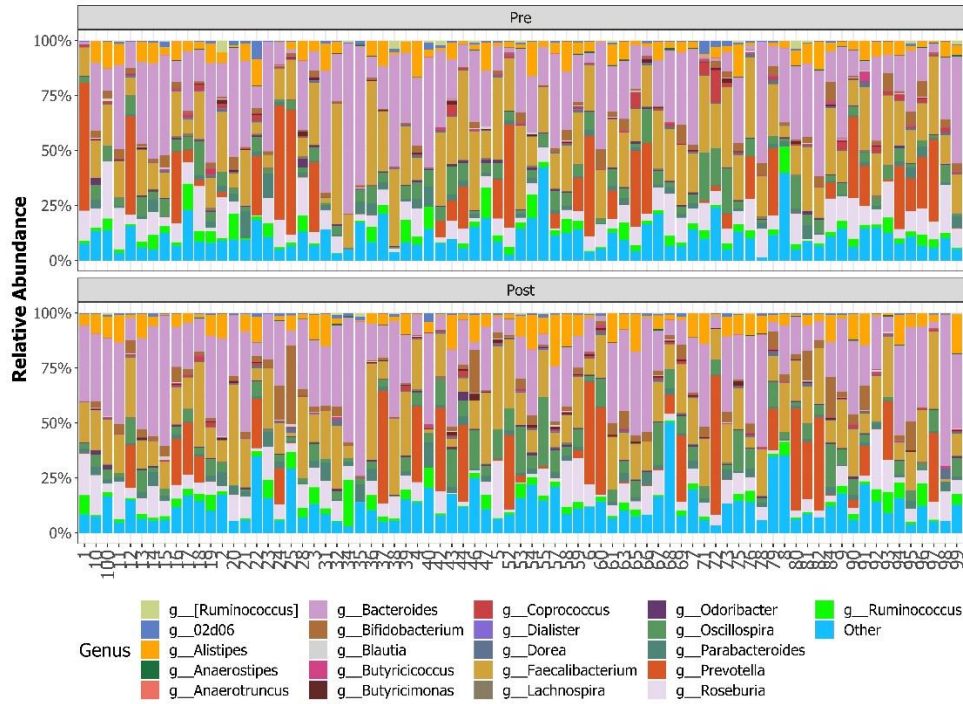

B.

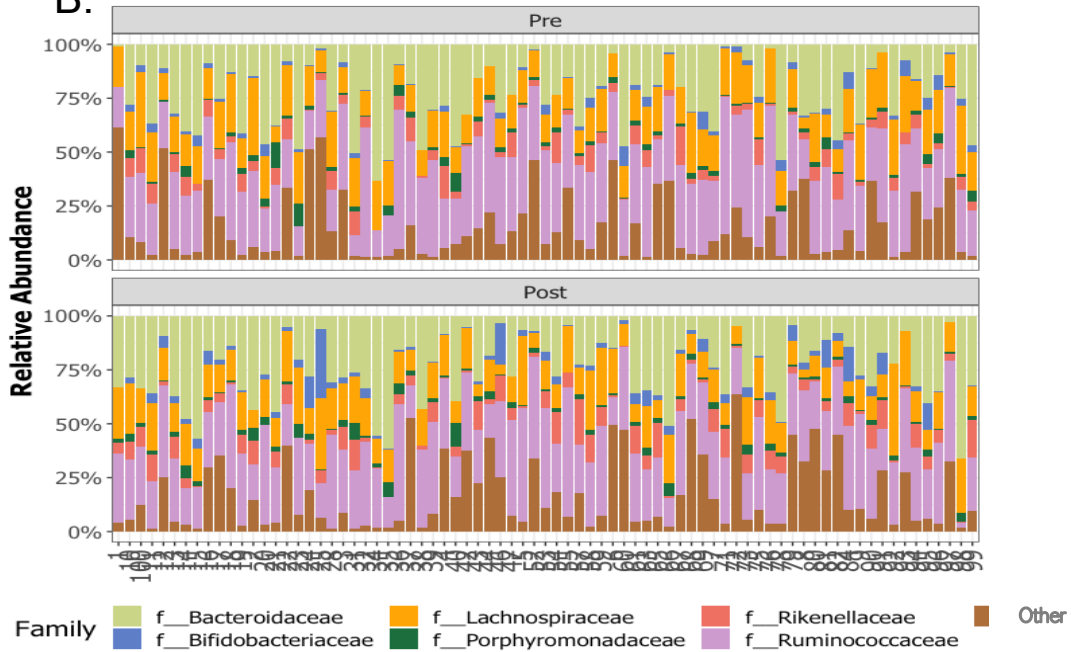

**Supplementary Fig. S6** Box plot representation of the relative abundance at A. Genera and B. Family level per sample pre and post supplementation. The figure was generated using (RStudio v 1.2 with R v 3.6)<sup>1</sup>

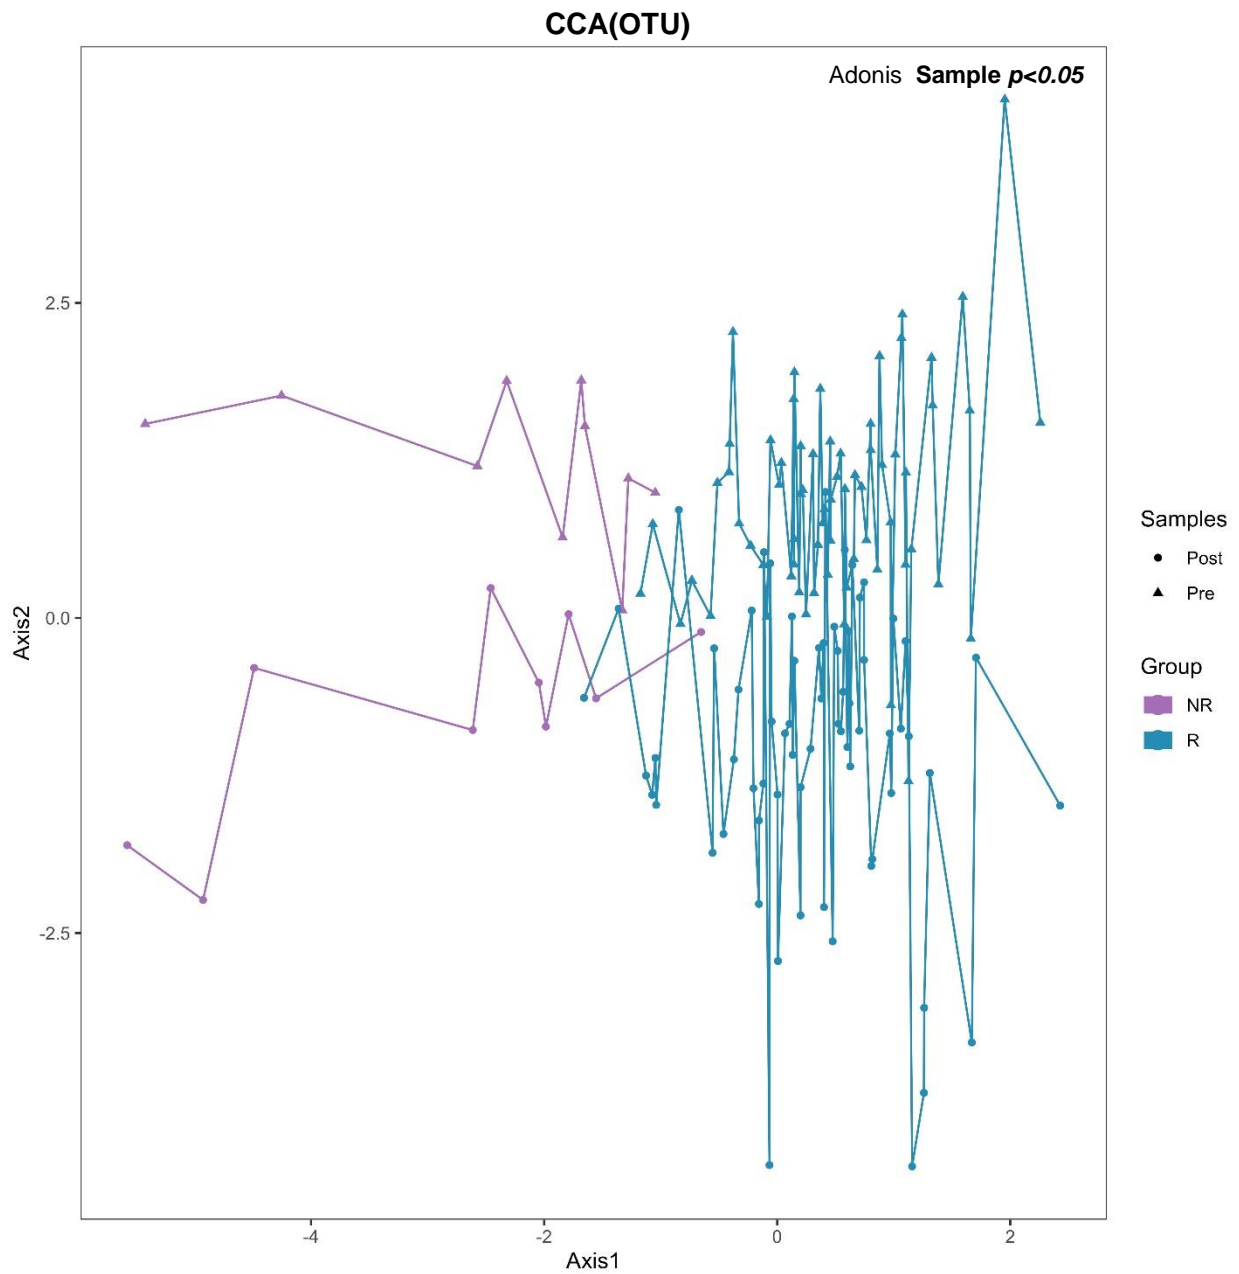

**Supplementary Fig. S7** Canonical Correspondence Analysis (CCA) visualizing the compositional distribution of the fecal microbiota pre- and post- vitamin D supplementation in responders and non-responders. The figure was generated using (RStudio v 1.2 with R v 3.6)<sup>1</sup>



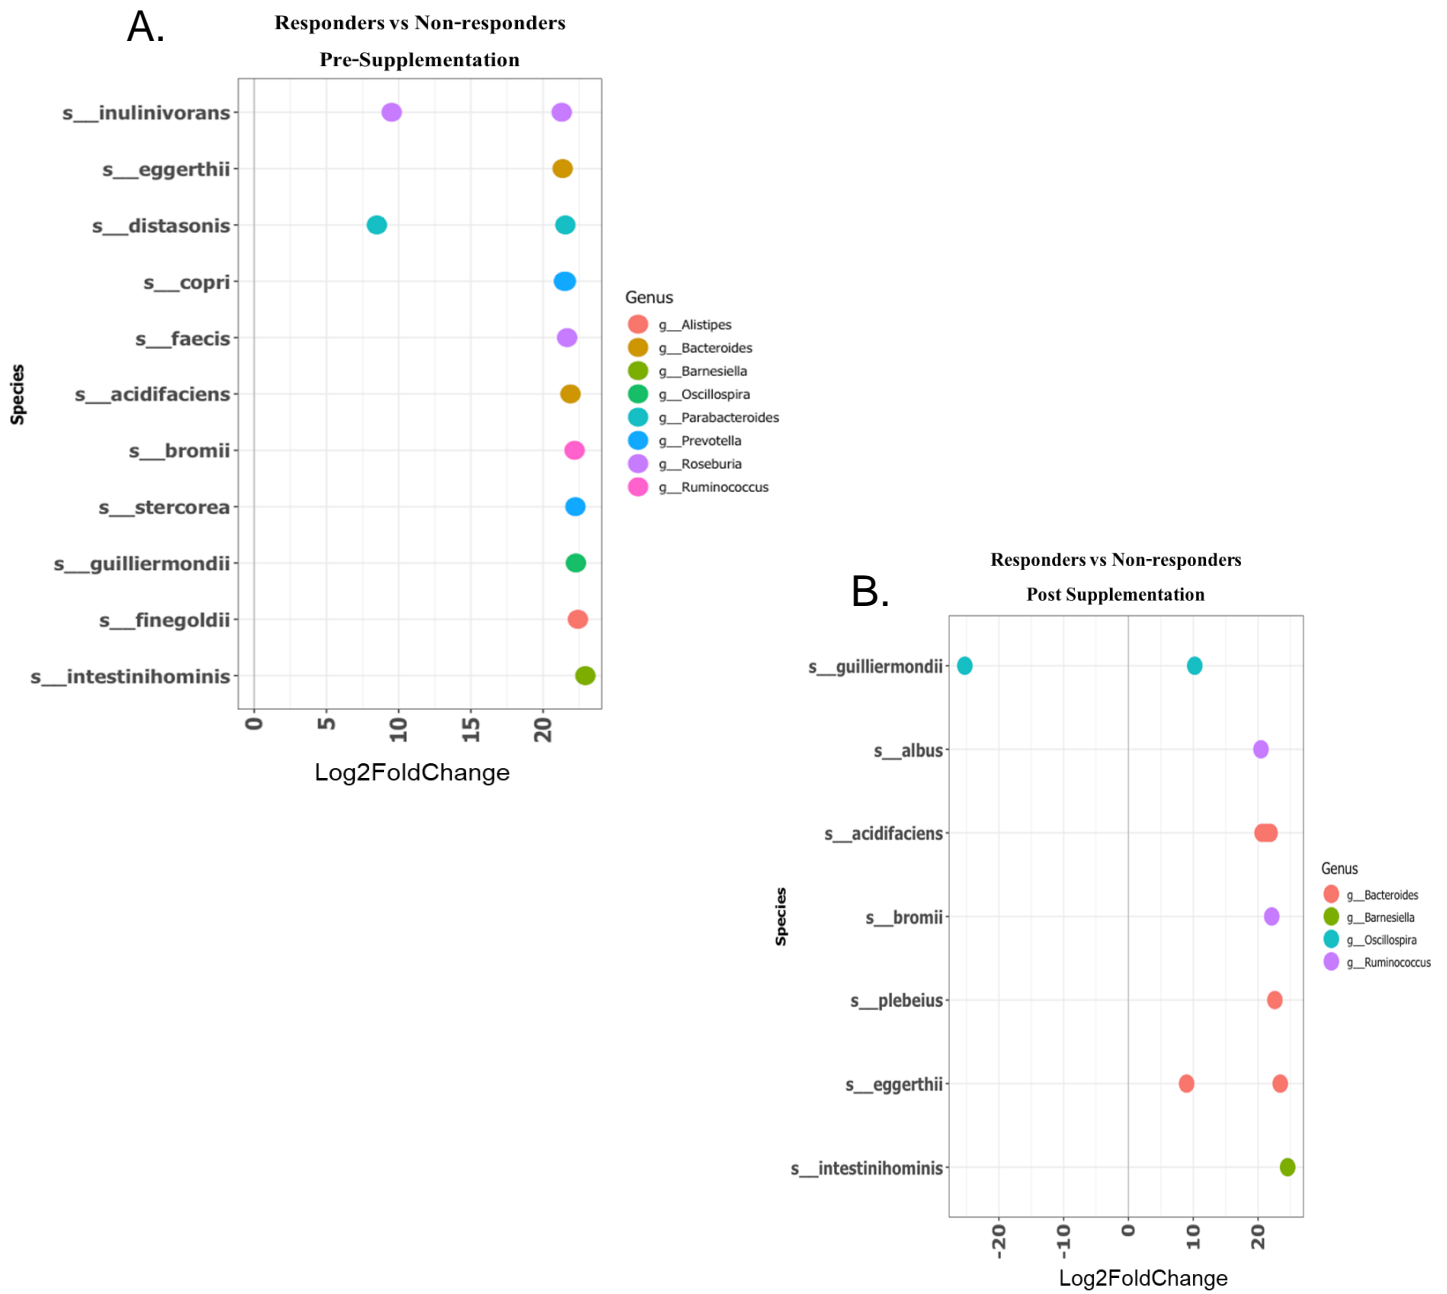

**Supplementary Fig. S8** DESeq2 differential abundance analysis of significantly different OTUs responder's vs non-responder's ( $p_{adj} < 0.05$ , FDR-corrected); A. Pre-supplementation B. Post-supplementation. OTUs to the right of the zero line were more abundant and OTUs to the left of the zero line were less abundant in responders compared to non-responders.

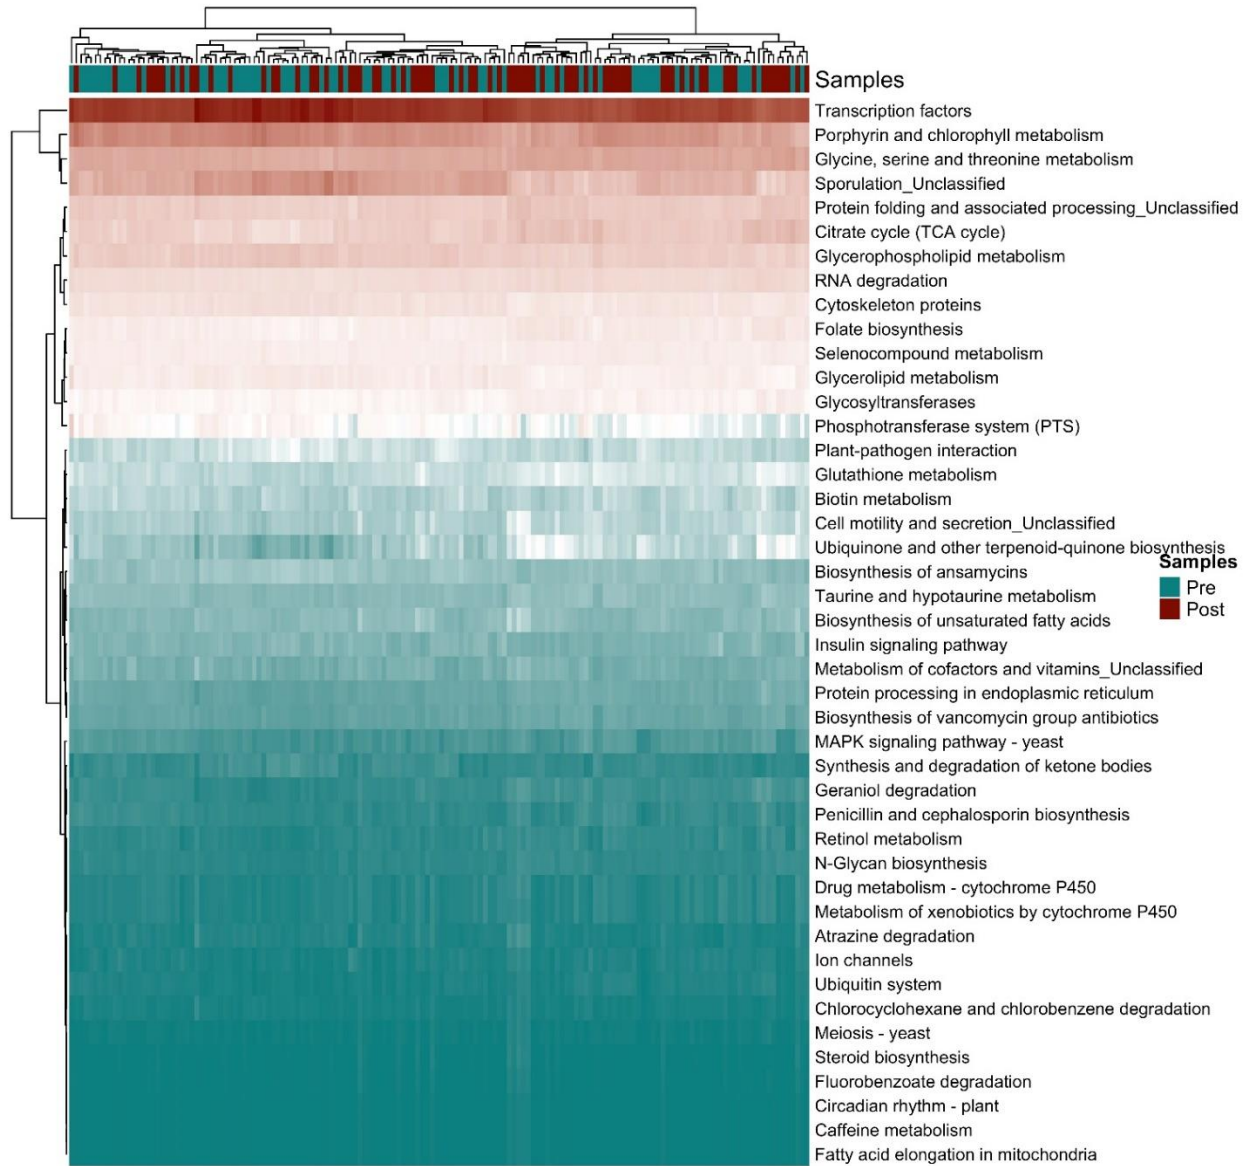

**Supplementary Fig. S9** Heat map representation of predicted functional gene expression pathways with significantly altered expression between pre- and post- Vitamin D supplementation samples, identified using PICRUSt analysis of 16S rRNA phylogenetic sequencing data. The figure was generated using (RStudio v 1.2 with R v 3.6)<sup>1</sup>

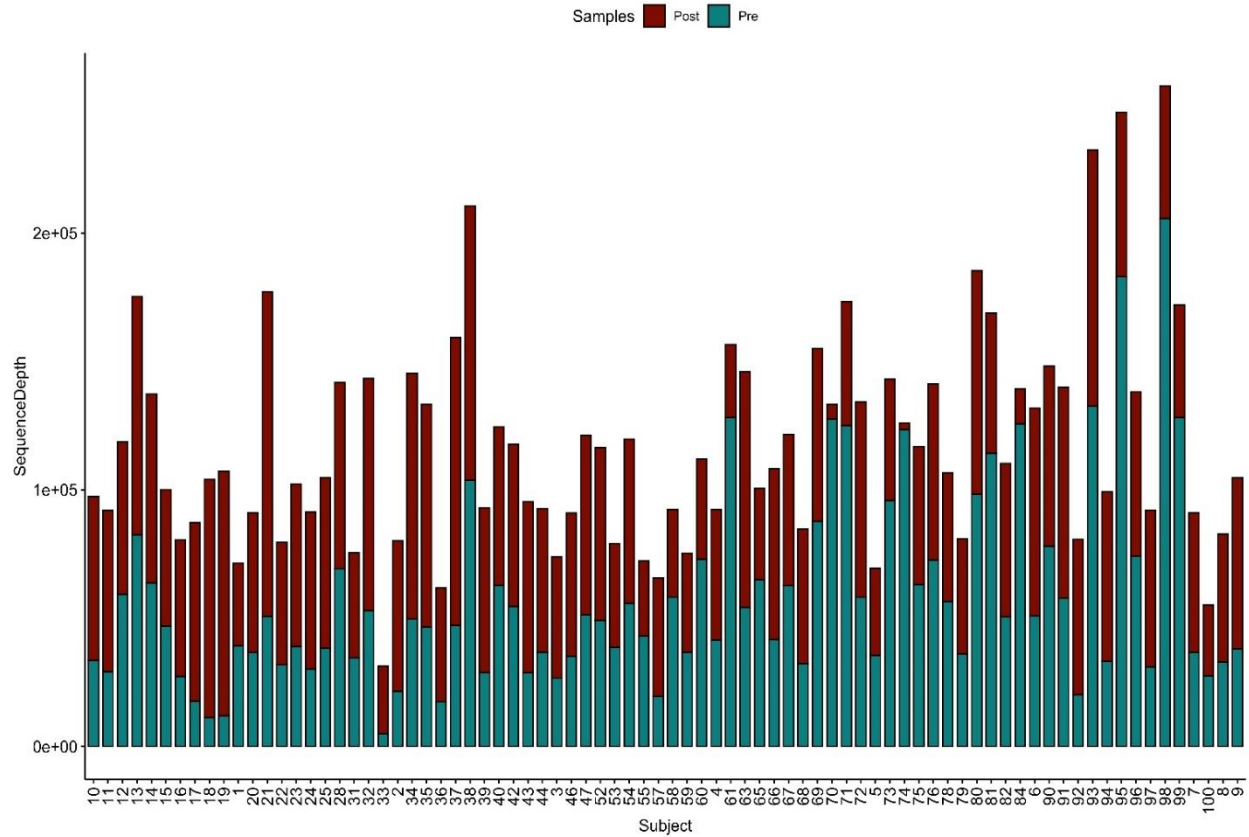

**Supplementary Fig. S10** The figure depicts uniform coverage across the samples and adequate sequencing representation in each of the pre- and post- vitamin D supplementation stool samples. This is further validated with the rarefaction curve in Supplementary Fig. S11. The figure was generated using (RStudio v 1.2 with R v 3.6)<sup>1</sup>

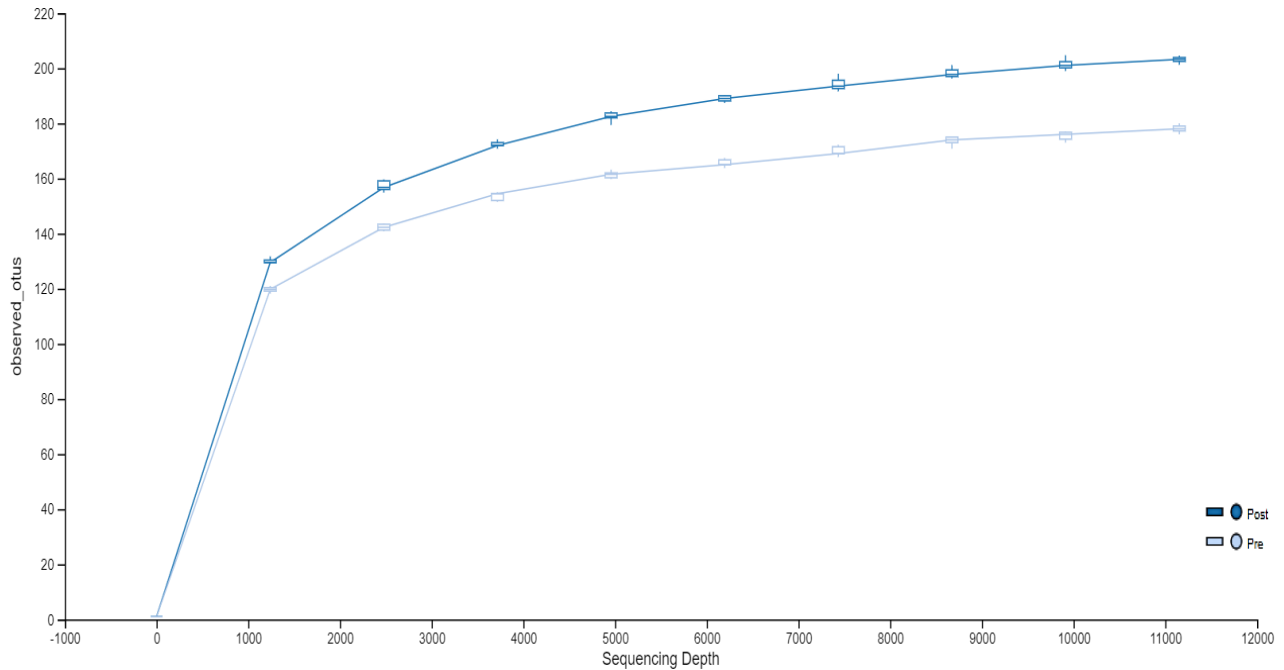

**Supplementary Fig. S11** Rarefaction curves of 16S rRNA gene sequence representing species diversity between the pre- and post- vitamin D supplementation samples based on observed OTUs. X-axis reports the number of sequences per sample. The figure was generated using QIIME2 (Version 2018.11)<sup>2</sup>

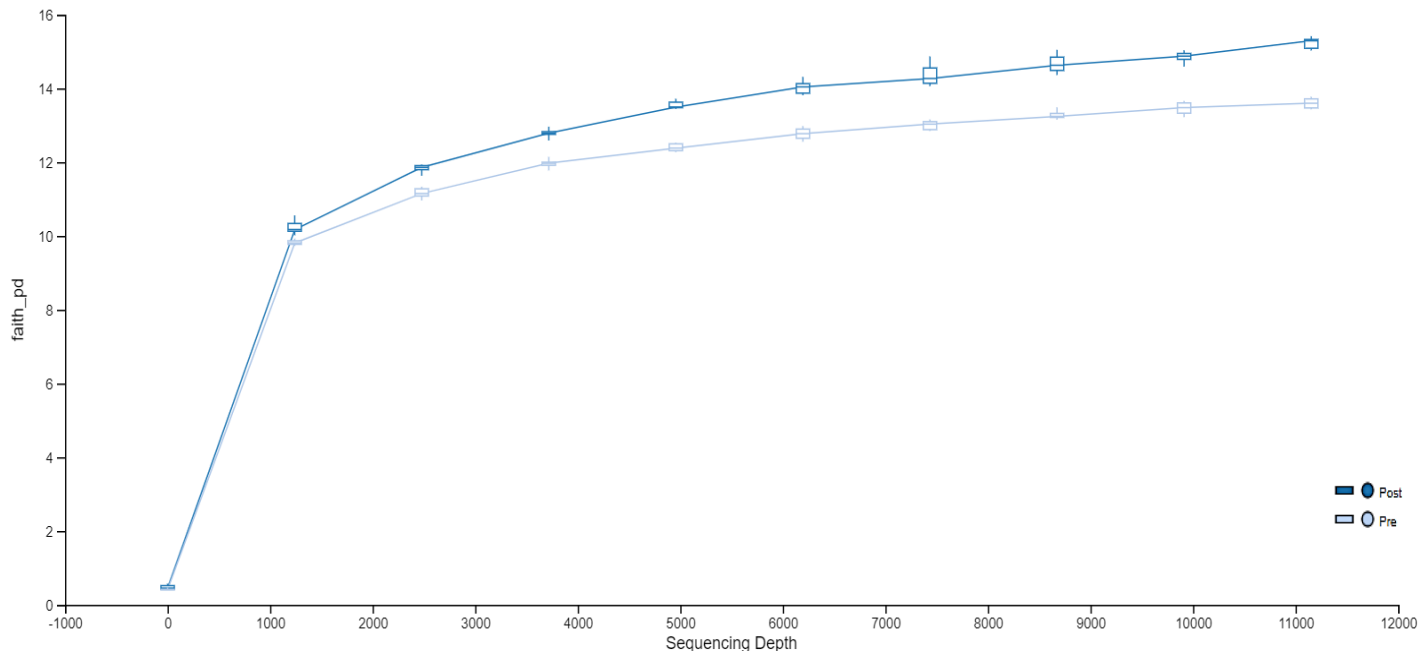

**Supplementary Fig. S12** Rarefaction curves of 16S rRNA gene sequence representing species diversity between the pre- and post- vitamin D supplementation samples based on Faith-PD. X-axis reports the number of sequences per sample. The figure was generated using QIIME2 (Version 2018.11)<sup>2</sup>

- 1 R Core Team, R. (R foundation for statistical computing Vienna, Austria, 2013).
- 2 Caporaso, J. G. *et al.* QIIME allows analysis of high-throughput community sequencing data. *Nat Methods* **7**, 335-336, doi:10.1038/nmeth.f.303 (2010).
